# Supplementary material for: Cost effectiveness of an intervention to increase uptake of hepatitis C virus testing and treatment (HepCATT): cluster randomised controlled trial in primary care
Source: PubMed Central journal article supplement — BMJ. 2020 Feb 26;368:m322. doi: 10.1136/bmj.m322 (PMC7190058; doi:10.1136/bmj.m322), 2020-02-26
Supplement: robk050980.ww1.pdf [file robk050980.ww1.pdf]

## **Supplementary Material:**

### **IA HEPCATT Intervention**

### **IB Standard Letter for Practices**

## **II – Supplementary Results**

*Table S1A: Control practice participants identified as high risk, and numbers of these undergoing antibody tests in the 6-month pre-study period and the 12-month study period.*

*Table S1B: Intervention practice participants identified as high risk, and numbers of these undergoing antibody tests in the 6-month pre-study period and the 12-month study period.*

*Table S2: Practice staff time spent inviting patients for screening*

## **III Economic Methods**

*Table S3: Read codes used to identify HCV-related consultations and tests*

*Figure S1: Economic model structure*

*Table S4 : Intervention probabilities and intervention effects*

*Table S5: Base case economic model costs*

*Table S6: Health state utilities*

*Table S7: Transition probabilities used in the economic model*

*Table S8: Transition probabilities derived from the posterior estimates of a back-calculation model for England (used in scenario analysis)*

*Figure S2A: Analysis of covariance (ANCOVA) for probabilistic sensitivity analysis*

*Figure S2B: Incremental cost-effectiveness ratio across various DAA treatment costs*

*Table S9: Additional scenario analysis results per individual identified as high risk by HepCATT intervention*

## **IV: HepCATT Study Algorithm (Read Codes)**

## IA HEPcATT Intervention

- Practice HCV audit tool and patient flag: we designed a new algorithm for the Audit+ Software (Informatica Systems Ltd) which once installed in practices would identify patients with high-risk HCV markers (see supplement material for a full list of risk markers and associated Read codes). The HCV audit tool was piloted and optimised in three general practices before it was rolled out. The audit was designed to identify registered patients who were i) aged 18-75 years and ii) had risk markers of HCV infection or were previously diagnosed with HCV but had not been referred in the last 12 months. The audit tool automatically excluded any patients tested less than one year ago who were HCV antibody negative, patients referred to hepatology, patients receiving low doses of buprenorphine and methadone via tablets and patches that are likely to be prescribed for pain management, and patients at end of life and/or receiving palliative treatment. We recommended the following stages.
  - Screen patient list: the audit was run and updated every 24 hours from the GP system during the 1-year intervention period. After the first run the practice was asked to screen the list of patients identified at the beginning of the intervention to exclude on the system any patient identified by the audit where they felt that an invitation for HCV testing or discussion of treatment was not appropriate.

Contact eligible patients and offer HCV testing: (1) opportunistically: patient records identified by the audit were automatically flagged creating on-screen pop-ups to encourage HCV testing if the patient attends the practice; (2) Letter or email: practice administrators were requested to send out a letter or email generated automatically by the software (see below), to each patient identified to consider having a free HCV test and follow-up patients by telephone, e-mail or text to book an appointment.

- 
- Educational training: Practices were encouraged to undertake free online HCV educational resources (such as RCGP e-learning module: <http://elearning.rcgp.org.uk/>), in addition the Trial Coordinator gave a one-hour educational presentation on HCV and trial procedures and instructions on use of the Audit+ software (Informatica Systems Ltd).
- Increasing patient awareness: posters and leaflets from HCV Trust [<http://www.hepctrust.org.uk/resources/leaflets-and-print-publications>] were provided for the practices to display in practice waiting rooms and consultation rooms highlighting the risk factors for HCV infection and treatment options.
- Clinical history: practices were asked to add an additional question “have you ever injected recreational drugs?” to the New Patient Registration.

**IB Standard Letter for Practices**

Dear «FullName»,

We are writing to tell you that your GP surgery is working on a new project with a research team from the University of Bristol. **The aim of the project is to encourage more people in the South West of England to get a free test for Hepatitis C.** The Hepatitis C virus can affect the liver and may need treatment. It is very important that the Hepatitis C virus is found and treated early, so that people can live a longer and healthier life. This GP surgery and the research team hope to test people for Hepatitis C, so that we can offer advice and free treatment to people who test positive for Hepatitis C.

**We would like to offer you the opportunity to have a free, simple test for Hepatitis C organised by your GP surgery.** Receiving this letter does **not** mean that the GP thinks you are ill. Many other people from the GP surgery have also received this letter and have been offered the test. **We hope as many people as possible will take this opportunity for an important free Hepatitis C test.**

If you agree to have a Hepatitis C test, this will **involve a 10 minute visit to your GP surgery.** A member of staff from the surgery will discuss hepatitis with you and then organise the test. The test will involve a simple blood test (either a standard blood test or a finger prick test).

**If you would like to talk about the project further or ask any questions, please contact the GP surgery.** A member of the surgery team may contact you to see if you would like to book an appointment to take part in the project, or you can call or attend the GP surgery. You can leave this project whenever you want without giving a reason and this will not affect your medical care.

Yours sincerely,

«PreferredGP»

## II – Supplementary Results

**Table S1A: Control practice participants identified as high risk, and numbers of these undergoing antibody tests in the 6-month pre-study period and the 12-month study period.**

| Practice code<br>[study period<br>start date] | Identified as high risk<br>/ number on list (%) | History of<br>injecting drug<br>use<br>(%) | Six-month pre-<br>study period | Twelve-month<br>study period |
|-----------------------------------------------|-------------------------------------------------|--------------------------------------------|--------------------------------|------------------------------|
|                                               |                                                 |                                            | Antibody test (%)              | Antibody test (%)            |
| <b>BRISTOL</b>                                |                                                 |                                            |                                |                              |
| AA [Apr 2016]                                 | 901/17158 (5.25)                                | 277 (1.61)                                 | 23 (2.55)                      | 86 (9.54)                    |
| AB [May 2016]                                 | 311/10092 (3.08)                                | 54 (0.54)                                  | 1 (0.32)                       | 33 (10.61)                   |
| AC [Jun 2016]                                 | 539/10267 (5.25)                                | 54 (0.53)                                  | 29 (5.38)                      | 43 (7.98)                    |
| AD [Jun 2016]                                 | 337/6752 (4.99)                                 | 191 (2.83)                                 | 3 (0.89)                       | 33 (9.79)                    |
| AE [Jul 2016]                                 | 510/7703 (6.62)                                 | 287 (3.73)                                 | 9 (1.76)                       | 27 (5.29)                    |
| AF [Aug 2016]                                 | 474/11318 (4.19)                                | 141 (1.25)                                 | 13 (2.74)                      | 71 (14.98)                   |
| AG [Aug 2016]                                 | 1159/8389 (13.82)                               | 550 (6.56)                                 | 76 (6.56)                      | 90 (7.77)                    |
| AH [Oct 2016]                                 | 518/10651 (4.86)                                | 211 (1.98)                                 | 12 (2.32)                      | 61 (11.78)                   |
| AI [Nov 2016]                                 | 286/6780 (4.22)                                 | 82 (1.21)                                  | 11 (3.85)                      | 33 (11.54)                   |
| AJ [Dec 2016]                                 | 491/13380 (3.67)                                | 163 (1.22)                                 | 23 (4.68)                      | 89 (18.13)                   |
| AK [Dec 2016]                                 | 503/11266 (4.46)                                | 202 (1.79)                                 | 19 (3.78)                      | 61 (12.13)                   |
| AL [Dec 2016]                                 | 561/11157 (5.03)                                | 224 (2.01)                                 | 27 (4.81)                      | 87 (15.51)                   |
| AM [Dec 2016]                                 | 10/4475 (0.22)                                  | 3 (0.07)                                   | 0                              | 4 (40.00)                    |
| AN [Dec 2016]                                 | 456/14208 (3.21)                                | 101 (0.71)                                 | 37 (8.11)                      | 79 (17.32)                   |
| <b>SOMERSET</b>                               |                                                 |                                            |                                |                              |
| AO [Apr 2016]                                 | 624/14804 (4.22)                                | 108 (0.73)                                 | 5 (0.80)                       | 24 (3.85)                    |
| AP [Apr 2016]                                 | 698/16019 (4.36)                                | 107 (0.67)                                 | 3 (0.43)                       | 60 (8.60)                    |
| AQ [May 2016]                                 | 713/18289 (3.90)                                | 97 (0.53)                                  | 14 (1.96)                      | 67 (9.40)                    |
| AR [Jul 2016]                                 | 1001/10260 (9.76)                               | 253 (2.47)                                 | 18 (1.80)                      | 54 (5.39)                    |
| <b>GLOS</b>                                   |                                                 |                                            |                                |                              |
| AS [Jul 2016]                                 | 220/7104 (3.10)                                 | 41 (0.58)                                  | 3 (1.36)                       | 40 (18.18)                   |
| AT [Aug 2016]                                 | 689/14477 (4.76)                                | 96 (0.66)                                  | 47 (6.82)                      | 101 (14.66)                  |

|                |                            |                    |                   |                     |
|----------------|----------------------------|--------------------|-------------------|---------------------|
| AU [Dec 2016]  | 375/5123 (7.32)            | 73 (1.42)          | 7 (1.87)          | 20 (5.33)           |
| <b>Overall</b> | <b>11376/229672 (4.95)</b> | <b>3315 (1.44)</b> | <b>380 (3.34)</b> | <b>1163 (10.22)</b> |

**Table S1B: Intervention practice participants identified as high risk, and numbers of these undergoing antibody tests in the 6-month pre-study period and the 12-month study period.**

| Practice code<br>[study period<br>start date] | Identified as high risk/<br>number on list (%) | History of<br>injecting drug<br>use (%) | Six-month pre-<br>study period | Twelve-month<br>study period |
|-----------------------------------------------|------------------------------------------------|-----------------------------------------|--------------------------------|------------------------------|
|                                               |                                                |                                         | Antibody test (%)              | Antibody test (%)            |
| <b>BRISTOL</b>                                |                                                |                                         |                                |                              |
| BA [Apr 2016]                                 | 462/1085 (4.26)                                | 229 (2.11)                              | 11 (2.38)                      | 56 (12.12)                   |
| BB [May 2016]                                 | 490/4660 (10.52)                               | 85 (1.82)                               | 40 (8.16)                      | 136 (27.76)                  |
| BC [May 2016]                                 | 724/9447 (7.66)                                | 152 (1.61)                              | 69 (9.53)                      | 159 (21.96)                  |
| BD [Jul 2016]                                 | 812/8611 (9.43)                                | 169 (1.96)                              | 56 (6.90)                      | 119 (14.66)                  |
| BE [Jul 2016]                                 | 1442/19264 (7.49)                              | 405 (2.10)                              | 47 (3.26)                      | 247 (17.13)                  |
| BF [Aug 2016]                                 | 454/7643 (5.94)                                | 128 (1.67)                              | 44 (9.69)                      | 122 (26.87)                  |
| BG [Aug 2016]                                 | 253/9580 (2.64)                                | 84 (0.88)                               | 11 (4.35)                      | 72 (28.46)                   |
| BH [Sep 2016]                                 | 189/8007 (2.36)                                | 62 (0.77)                               | 2 (1.06)                       | 19 (10.05)                   |
| BI [Nov 2016]                                 | 509/10410 (4.89)                               | 138 (1.33)                              | 23 (4.52)                      | 83 (16.31)                   |
| BJ [Dec 2016]                                 | 462/9671 (4.78)                                | 157 (1.62)                              | 27 (5.84)                      | 90 (19.48)                   |
| BK [Jan 2016]                                 | 339/7656 (4.43)                                | 97 (1.27)                               | 16 (4.72)                      | 63 (18.58)                   |
| BL [Mar 2017]                                 | 1112/15621 (7.12)                              | 168 (1.08)                              | 42 (3.78)                      | 122 (10.97)                  |
| BM [Mar 2017]                                 | 651/16113 (4.04)                               | 162 (1.01)                              | 74 (11.37)                     | 168 (25.81)                  |
| <b>SOMERSET</b>                               |                                                |                                         |                                |                              |
| BN [Apr 2016]                                 | 1017/11578 (8.78)                              | 241 (2.08)                              | 29 (2.85)                      | 123 (12.09)                  |
| BO [Apr 2016]                                 | 1006/13695 (7.35)                              | 139 (1.01)                              | 32 (3.18)                      | 149 (14.81)                  |
| BP [Jun 2016]                                 | 504/7325 (6.88)                                | 67 (0.91)                               | 29 (5.75)                      | 56 (11.11)                   |
| BQ [Aug 2016]                                 | 1318/22149 (5.95)                              | 158 (0.71)                              | 16 (1.21)                      | 102 (7.74)                   |
| <b>GLOS</b>                                   |                                                |                                         |                                |                              |
| BR [Apr 2016]                                 | 313/12145 (2.58)                               | 107 (0.88)                              | 3 (0.96)                       | 63 (20.13)                   |
| BS [Aug 2016]                                 | 316/13376 (2.36)                               | 91 (0.68)                               | 10 (3.16)                      | 52 (16.46)                   |
| BT [Dec 2016]                                 | 111/8709 (1.27)                                | 16 (0.18)                               | 10 (9.01)                      | 40 (36.04)                   |
| BU [Dec 2016]                                 | 613/13469 (4.55)                               | 75 (0.56)                               | 17 (2.77)                      | 30 (4.89)                    |
| <b>Overall</b>                                | <b>13097/239974 (5.46)</b>                     | <b>2930 ( 1.22)</b>                     | <b>608 (4.64)</b>              | <b>2071 (15.81)</b>          |

**Table S2: Practice staff time spent inviting patients for screening**

| <b>Task</b>                   | <b>Mean hours<br/>(Min, Max)</b> | <b>N practices<br/>reporting</b> | <b>Staff involved</b>                                                 | <b>Estimated<br/>cost</b> |
|-------------------------------|----------------------------------|----------------------------------|-----------------------------------------------------------------------|---------------------------|
| Installation of software*     | 2.9<br>(1, 15)                   | 18/22                            | Admin (7)<br>Practice Manager (6)<br>IT (4)<br>GP (1)<br>Multiple (2) | £115                      |
| Screening patient list        | 5.5<br>(1, 30)                   | 17/22                            | GP (10)<br>GP & other (6)<br>Nurse (1)<br>Admin (3)                   | £430                      |
| Preparing and mailing letters | 3.8<br>(2, 13)                   | 17/22                            | Admin (16)<br>GP (1)<br>Other (3)                                     | £102                      |
| Follow up phone calls         | 2.3<br>(0, 5)                    | 11/21                            | Admin (8)<br>HCA (1)<br>Multiple (2)                                  | £61                       |

\*272 practice staff received training 158 (58%) GPs and 44 (16%) nurses with a median 12 (6 to 43) staff trained per practice.

### **III Economic Methods**

#### *Economic Analysis*

We estimated the short-term cost-effectiveness of the case finding intervention from the NHS perspective. We used a proforma to record the number of practices who received the HCV training, including the number of practice staff trained and job titles. The training session took approximately 1 hour and was delivered by a member of the research team who visited each practice. Staff unable to attend the training session were sent the training session slides for review. Because of this, we estimated that practice staff participated in, on average, 30 minutes of training. We further assumed that trainers took on average 2 hours per training session (30 minute journey each way) when estimating trainer time. Travel expenses for each practice were recorded by the trainer. These upfront training costs are a one-off expense which would not recur if HCV case finding is extended beyond the first year.

For the trial, Audit+ software and ongoing support were contracted with Informatica Systems Limited at an agreed cost per practice. Although Audit+ has much wider functionality, it is probable that, during the study period, practices used it predominantly for HCV case finding. Audit+ is now routinely available to GP practices via the essential part of GP Systems of Choice contractual framework; most of the costs of this are paid centrally by the Government rather than by the CCG or practice. As Audit+ has much wider functionality, the proportion of the cost that can be fairly attributed to HCV case finding will depend on the unknown extent to which GPs use the other functions. In our primary analysis we estimated cost-effectiveness assuming an annual license and support cost of £500 and that Audit+ is solely used for HCV case finding.

Practice staff were provided with a proforma to record the time taken to install the software, extract and screen the lists of high risk patients each time the Audit+ search was run. The proforma also asked staff to record the number of letters sent to patients inviting them to book an appointment. At the end of the intervention period, in both intervention and control sites we extracted information from the GP electronic patient record on HCV-related consultations received by patients identified as high risk by Audit+ during the study period. These were defined based on Read codes (Table S3). Data on laboratory tests (antibody testing and PCR) and referrals to hepatology for viral load testing were extracted from PHE electronic records. We considered PHE records to be the reference standard for laboratory testing. GP records and PHE records showed good agreement for HCV antibody tests, but poorer agreement for PCT tests and referrals to Hepatology. In a sensitivity analysis we estimated costs of laboratory testing and referrals based on GP instead of PHE records to test the robustness of our findings.

We used national unit costs to value staff time spent identifying and inviting patients to screening, taking blood samples, HCV antibody and PCR testing and HCV-related consultations and referrals (Table 2). We compared costs between intervention and control practices using mixed effects linear regression, clustered by practice, adjusting for whether an individual's practice was in Bristol or not, whether that practice had at baseline a high HCV testing rate or not, and length of follow up. We calculated the incremental cost per patient referred for viral load testing in intervention versus control practices. Uncertainty was explored using a cost-effectiveness acceptability curve, which estimate the probability that the intervention is cost-effective at various willingness-to-pay



thresholds<sup>1</sup>. We used a two-stage nonparametric bootstrap resampling procedure for clustered data to estimate the cost-effectiveness acceptability curve<sup>2</sup>.

In a further sensitivity analysis we assumed that all upfront costs (i.e. training & software installation costs) are £0 and that Audit+ is a core element of the GP electronic health record and its functions are widely used by GPs such that the software license and maintenance cost per patient identified for HCV screening is effectively £0.

**Table S3: Read codes used to identify HCV-related consultations and tests<sup>1</sup>**

| <b>Description</b>                                       | <b>Code</b> |
|----------------------------------------------------------|-------------|
| <b>Examinations/Signs</b>                                |             |
| Hepatitis C status                                       | 2J1..       |
| Hepatitis C non immune                                   | 2J12        |
| Hepatitis C resolved                                     | 2126700     |
| Hepatitis C immune                                       | 2J11        |
| <b>Diagnostic codes</b>                                  |             |
| Viral Hepatitis C with coma                              | A7040       |
| Viral hepatitis C without mention of hepatic coma        | A7050       |
| Chronic viral hepatitis C                                | A7072       |
| Hepatitis C                                              | A70z0       |
| Hepatitis C genotype 1                                   | A70A        |
| Hepatitis C carrier                                      | ZV02C       |
| Congenital viral Hepatitis                               | Q409.       |
| Viral hepatitis carrier                                  | ZV026       |
| Contact with and exposure to viral hepatitis             | ZV01B       |
| [V]Hepatitis C carrier                                   | ZV02C00     |
| <b>Laboratory procedures</b>                             |             |
| Hepatitis C antibody test                                | 43X2.       |
| Hepatitis C antibody test positive                       | 43X3.       |
| Hepatitis C antibody level                               | 43X6.       |
| Hepatitis C IgG level                                    | 43JK        |
| Hepatitis C antibody test negative                       | 43X4        |
| Hepatitis C PCR                                          | 43h3.       |
| Hepatitis C nucleic acid detection                       | 43j5.       |
| HepC nucleic acid detection assay                        | 43j50       |
| Hepatitis C virus RNA assay                              | 43q..       |
| Hepatitis C viral load                                   | 4J3B.       |
| HepC PCR negative                                        | 4JQC.       |
| Hepatitis C PCR positive                                 | 4JQD        |
| Hepatitis C virus genotype                               | 4JQ3        |
| Hepatitis C non- immune                                  | 43B7.       |
| Hepatitis C recombinant immunoblot assay                 | 43dD.       |
| Hepatitis C antigen level                                | 43k1.       |
| HepC antigen negative                                    | 4JQE.       |
| Hepatitis C antigen positive                             | 4JQF        |
| <b>Preventative procedures</b>                           |             |
| Hepatitis C contact                                      | 65PM.       |
| Viral hepatitis carrier                                  | 65Q7.       |
| Hepatitis C screening counselling                        | 677Q.       |
| HepC screening                                           | 6829.       |
| <b>Operations and procedures</b>                         |             |
| RSV treatment and Hepatitis C treatment drugs b1         | 7Q053       |
| <b>Other therapeutic procedures</b>                      |             |
| Referred to hepatology service                           | 8Hk5        |
| <b>Administration procedures</b>                         |             |
| Hepatitis C screening positive-enhanced services         | 9kV..       |
| HepC screening neg- enhanced services admin              | 9kT..       |
| Chronic hepatitis annual review- enhanced services admin | 9kR..       |
| HepC screening offered                                   | 9Op1.       |
| On hepatitis C treatment plan                            | 9NgR        |
| Hepatology                                               | 9b9V        |
| <b>Local codes</b>                                       |             |
| Hepatitis C PCR positive                                 | EMISNQHE29  |
| Hepatitis C negative                                     | EMISNQHE30  |
| Referred for hepatology                                  | EMISNQRE49  |

<sup>1</sup> HCV-related consultations were defined as any event where an HCV-related examination/sign or diagnosis code was recorded in the GP electronic record;

We estimated the cost-effectiveness of the HepCATT case finding intervention from the NHS perspective. More detailed methods on economic evaluation are given in supplementary material.

### *HCV Case-finding*

We used a proforma to record the number of practices who received the HCV training, including the number of practice staff trained and job titles and allocated upfront training costs as a one-off expense. Two practices did not respond to the survey and a further six partially completed the survey. For the trial, Audit+ software and ongoing support were contracted with Informatica Systems Limited at an agreed cost per practice used predominantly for HCV case finding. In our primary analysis we estimated cost-effectiveness assuming an annual license and support cost of £500 and that Audit+ is solely used for HCV case finding. In sensitivity testing we removed all upfront costs and Audit+ installation, training and maintenance costs (as Audit+ is now routinely available to GP practices via the essential part of GP Systems of Choice contractual framework paid centrally by the Government – with much wider functionality than just HCV case finding).

Practice staff also used a proforma to record the time taken to install the software, extract and screen the lists of high-risk patients each time the Audit+ search was run, and the number of letters (emails or phone calls) inviting patients to book an appointment. At the end of the intervention period, in both intervention and control sites we extracted information from the GP electronic patient record on HCV-related consultations received by patients identified as high risk by Audit+ during the study period. These were defined based on Read codes (Table S1).

We used national unit costs to value staff time spent identifying and inviting patients to screening, taking blood samples, HCV antibody and PCR testing and HCV-related consultations and referrals. We compared costs between intervention and control practices using mixed effects linear regression, clustered by practice, adjusting for sampling stratification, and length of follow up. We estimated the cost of HCV case-finding per high risk patient identified through the HCV algorithm and calculated the incremental cost per patient assessed at secondary care in intervention versus control practices. Uncertainty was explored using a cost-effectiveness acceptability curve, which estimate the probability that the intervention is cost-effective at various willingness-to-pay thresholds<sup>1</sup>. We used a two-stage nonparametric bootstrap resampling procedure for clustered data to estimate the cost-effectiveness acceptability curve<sup>2</sup>.

### *Cost-effectiveness Model*

#### **Model analysis**

A Markov model was developed to capture the increased rate of testing, and the higher linkage to care observed in the intervention arm, versus the control arm. The control arm (no intervention) was the only model comparator. The analysis was performed from an NHS perspective, and results are

presented in 2017 pounds (£, GBP). Outcomes are reported as quality adjusted life years (QALYs). Both costs and QALYs were discounted at 3.5%, as per NICE guidelines<sup>3</sup>. The model results are presented as incremental cost-effectiveness ratios (ICER), which were calculated as the incremental costs divided by the incremental QALYs, to give a cost per QALY gained. Individuals moved between health states during a six-month cycle length, and the model used a lifetime time horizon. Since the Markov model considers a static population, the intervention was assumed to occur for one year only in the base case analysis. To consider the impact of the intervention upon new individuals joining a particular primary care centre, an analysis excluding training costs was performed. In the absence of data on the mean age of individuals identified during the intervention, we assumed a starting age in the model of 45. This corresponds to the age group (40-49 years old) with most prevalent number of chronic HCV infections amongst current- and ex-PWID in England, as estimated by Harris et al<sup>4</sup>.

### **Model structure**

The Markov model captures the natural history of HCV using eight main clinical health states, and is similar to those used in previous economic evaluations<sup>5 6</sup>. For early health states, disease status is classified according to the modified HAI (Ishak) score for mild HCV (F0-F2), moderate HCV (F3-F5) and compensated cirrhosis (F6, CC). For individuals with mild HCV, moderate HCV or compensated cirrhosis, health states are mirrored to capture the following diagnosis statuses; 'undiagnosed', 'diagnosed', 'on-treatment', 'SVR', or 'non-SVR'. The model structure schematic is presented in Figure S1. It was assumed that for individuals progressing beyond compensated cirrhosis (to decompensated cirrhosis [DC] or HCC health states) that their HCV infection status would become known due to the severity of their disease. In addition to HCV related mortality associated with decompensated cirrhosis, HCC and liver transplant health states, the model also captures the risk of non-HCV related mortality, for all individuals in the model (i.e. regardless of their current health state). This background risk of non-HCV related mortality was derived from UK life tables<sup>7</sup>. There is no information of injecting status of those identified and attending for HCV testing, therefore we did not model disease transmission. Since the model did not capture disease transmission, it is likely that the estimated ICER will be conservative, as it does not consider the prevention benefit associated with reduced onward transmission as a result of testing and treatment. However, scenarios were performed to consider the impact of lower utility values associated with people who inject drugs (PWIDs) and a threshold analysis presented below considering reinfection.

**Figure S1: Economic model structure**

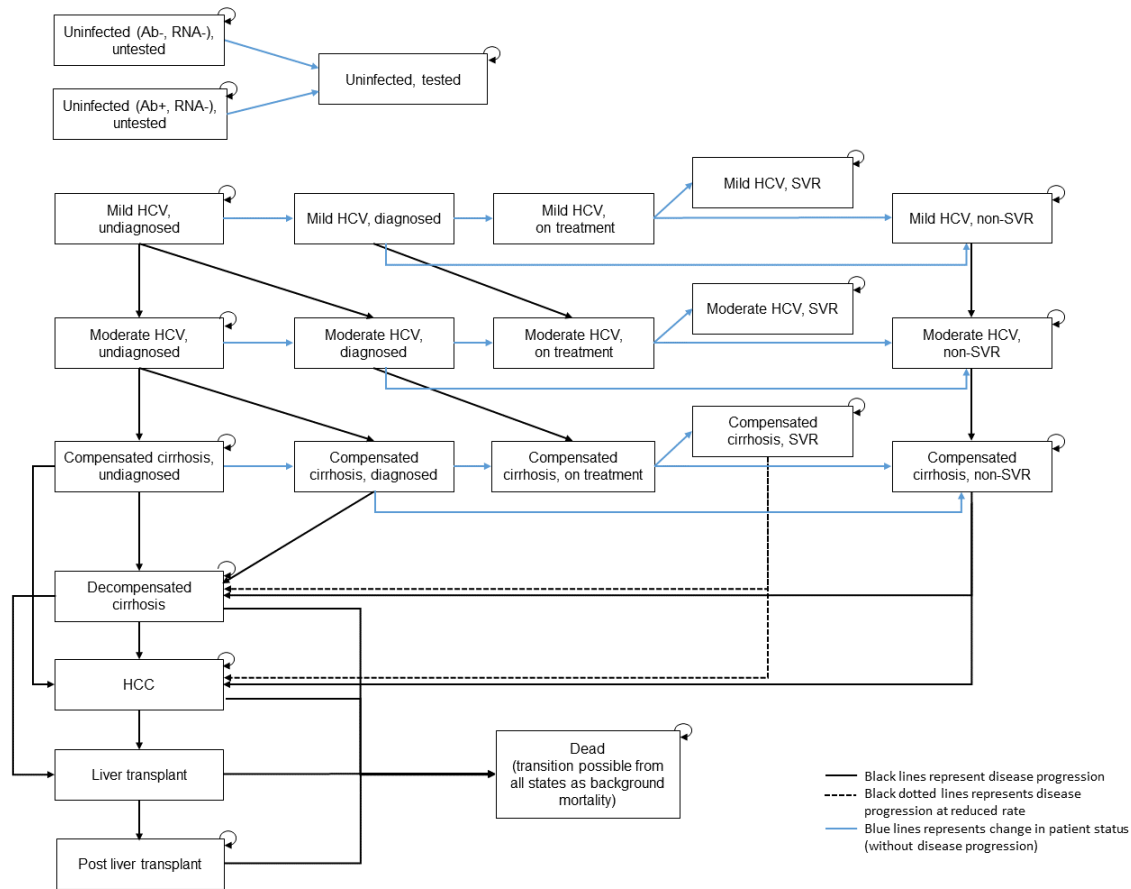

### **Intervention effects and linkage to care**

The intervention probabilities are presented in **Table S4**, utilising the intervention rate shown in the main paper (Table 3). The background rate of testing was calculated using the mixed-effects Poisson regression model for antibody testing in intervention and control practices. Since there was only weak evidence for a higher proportion of HCV antibody positive tests in the intervention practices compared to the control practices (6.2% versus 4.4%, Table 3), this difference was not included in the base case economic analysis. A scenario analysis was performed to consider a higher antibody yield in the intervention arm presented below. The model captured this difference by adjusting the probability of testing for infected and uninfected individuals within the intervention arm to achieve a higher antibody yield as suggested by the intervention (risk ratio of 1.42). Of those testing HCV antibody positive, it was assumed that reflex PCR testing (PCR test on the same blood sample used for the HCV antibody test) was performed. Of all PCR tests performed, 56 were positive and 83 were negative, with 41 either having missing results or insufficient sample to confirm. The proportion of RNA positive PCR tests was derived from those tests, with a confirmation of conclusive test results being achieved in 40.3% of samples (56/139). Due to the high proportion of inconclusive PCR test results, a scenario was performed shown below in which the proportion of RNA positive tests was derived from PHE sentinel surveillance statistics (72.3%)<sup>8</sup>.

A viral load test in secondary care for those testing RNA positive in primary care was considered as successful referral (and engagement) with secondary care. The adjusted rate ratio for viral load tests between the arms was 5.78 (95% CI: 1.55, 21.61) as displayed in Table 3. However, for the parameterisation of the economic model, the proportion receiving a viral load test subsequent to a positive RNA test was required. Of all those testing RNA positive, 47% in the intervention arm (20/43) and 23% in the control arm (3/13) were successfully referred and engaging in secondary care (as indicated by a viral load test in secondary care). In the base case analysis, the unadjusted proportions for the intervention and control arms were used for this parameter. A more conservative scenario was also performed in which the linkage to care for each arm was equal, using a weighted average of the overall linkage to care (shown in main results above).

The probability of achieving SVR was derived from a real world study performed in the UK<sup>9</sup>. For individuals that did not achieve SVR with their first treatment, it was assumed that they would be retreated once, and the SVR rates associated with retreatment were derived from a clinical study amongst individuals that had not responded to prior DAA containing therapy<sup>10</sup>. The economic model analysis was pan-genotypic and did not capture outcomes by genotype.

Table S4 shows the economic model inputs for the Markov model, based on the intervention results reported in the main text (Table 3).

**Table S4 : Intervention probabilities and intervention effects**

| Base case probabilities                                            | Mean  | Distribution                                                      | Source                       |
|--------------------------------------------------------------------|-------|-------------------------------------------------------------------|------------------------------|
| <b>Testing rate and intervention effect</b>                        |       |                                                                   |                              |
| Annual probability of testing (control)                            | 9.7%  | Multivariate normal distribution <sup>†</sup>                     | HepCATT                      |
| Antibody testing rate ratio (intervention)                         | 1.59  | Multivariate normal distribution <sup>†</sup> (95% CI 1.21, 2.08) | HepCATT                      |
| <b>Antibody prevalence</b>                                         |       |                                                                   |                              |
| Antibody prevalence (combined)                                     | 4.39% | Beta ( $\alpha=180$ , $\beta=3,054$ )                             | HepCATT                      |
| Antibody yield treatment effect rate ratio – Scenario <sup>^</sup> | 1.42  | N/A                                                               | HepCATT                      |
| <b>Linkage to care</b>                                             |       |                                                                   |                              |
| Proportion of reflex PCR tests                                     | 100%  | N/A                                                               | Assumption                   |
| Proportion of RNA+ (of Ab+)                                        | 40.3% | Beta ( $\alpha=56$ , $\beta=83$ )                                 | HepCATT                      |
| Proportion of RNA+ (of Ab+) – Scenario                             | 72.3% | N/A                                                               | Simmons 2018                 |
| Probability of referral and attendance (control)                   | 23.1% | Beta ( $\alpha=3$ , $\beta=10$ )                                  | HepCATT                      |
| Probability of referral and attendance (intervention)              | 46.5% | Beta ( $\alpha=20$ , $\beta=23$ )                                 | HepCATT                      |
| Probability of referral and attendance (combined) – Scenario       | 41.1% | Beta ( $\alpha=23$ , $\beta=33$ )                                 | HepCATT                      |
| Probability of treatment (post referral) <sup>”</sup>              | 90%   | Uniform (0.8, 1)                                                  | Assumption                   |
| Initial proportion mild                                            | 55.9% | Dirichlet (55.9,33.9,10.2) <sup>*</sup>                           | Ward 2016 <sup>11</sup>      |
| Initial proportion moderate                                        | 33.9% | Dirichlet (55.9,33.9,10.2) <sup>*</sup>                           | Ward 2016                    |
| Initial proportion cirrhotic                                       | 10.2% | Dirichlet (55.9,33.9,10.2) <sup>*</sup>                           | Ward 2016                    |
| <b>Treatment outcomes</b>                                          |       |                                                                   |                              |
| Mild / moderate HCV                                                | 92.8% | Beta ( $\alpha=376$ , $\beta=29$ )                                | UK National Cohort           |
| Compensated cirrhosis                                              | 90.8% | Beta ( $\alpha=736$ , $\beta=75$ )                                | UK National Cohort           |
| Mild / moderate HCV (retreatment)                                  | 93.9% | Beta ( $\alpha=77$ , $\beta=5$ )                                  | Bourlière 2017 <sup>10</sup> |
| Compensated cirrhosis (retreatment)                                | 85.5% | Beta ( $\alpha=59$ , $\beta=10$ )                                 | Bourlière 2017               |

<sup>^</sup> Treatment effect in base case analysis bounded by 1 due to model structure

<sup>”</sup> Of individuals that received a viral load test in secondary care, 90% would go on to receive DAA treatment.

<sup>\*</sup> Assumed sample size of 100 for probabilistic distribution

<sup>†</sup> Multivariate normal distribution of Cholesky decomposition, derived from the mixed-effects Poisson regression model (presented in Table 3 of the manuscript). Antibody testing rate ratio covariate included for intervention arm.

## Costs

**Table S5** shows care pathway costs used in the economic model. The mean training costs associated with the intervention were £1.22 per individual on the screening list (practice level cost ranging from £0.39 to £3.89). The mean cost of screening the list and sending invitations (per individual) was £2.06 (practice level cost ranging from £0.56 to £9.13). The cost of an antibody test was £8.12 per test (Public Health England), with HCV phlebotomy appointment cost of £14.10 (derived from private healthcare costs). The cost of a PCR test, assumed to be performed as a reflex test, was £90.64. The cost of DAA treatments in the UK is confidential, although it is believed to be significantly lower than UK list prices (approximately £35,000), with evidence that costs are below £10,000<sup>12</sup>. In this analysis, we assumed DAA costs of £10,000, with £15,000 assumed for retreatment. These costs were only incurred upon achievement of SVR, based on current NHS policy. We also performed a scenario in which DAA treatment cost was reduced to £5,000 (shown in the main results above). We also show the ICER across a range of DAA costs, up to £35,000 (Figure S2B). Health state costs were derived from a previous HTA performed in the UK<sup>13</sup>. The health state costs associated with SVR (for mild, moderate and compensated cirrhosis health states) were derived from Grishchenko 2009<sup>14</sup> (**Table S5**). Health state costs were inflated to 2017 costs using the Hospital and Community Health Services Pay and Prices inflation index.



**Table S5: Base case economic model costs**

| <b>Costs (per year, except where noted)</b>     | <b>Cost</b> | <b>Distribution</b>                                             | <b>Source</b>                                               |
|-------------------------------------------------|-------------|-----------------------------------------------------------------|-------------------------------------------------------------|
| <b>Intervention and care pathway costs</b>      |             |                                                                 |                                                             |
| Cost of training per individual (intervention)  | £1.22       | Gamma (k=1.7746, $\theta$ =1.4546)                              | HepCATT (Table 4)                                           |
| Cost of screening per individual (intervention) | £2.06       | Gamma (k=0.8879, $\theta$ =0.431)                               | HepCATT (Table 4)                                           |
| Cost HCV appointment                            | £14.10      | Varied by staff cost variation <sup>#</sup>                     | Based on private practice (se bridge street medical centre) |
| HCV antibody test                               | £8.12       | Varied by test cost variation <sup>^</sup>                      | Public Health England                                       |
| Cost of PCR test                                | £90.64      | Varied by test cost variation <sup>^</sup>                      | Public Health England                                       |
| Outpatient evaluation                           | £238        | Uniform(£190.40, £285.60)                                       | NHS reference costs 2016/17                                 |
| Further outpatient evaluation                   | £262        | Uniform(£209.60, £314.40)                                       | NHS reference costs 2016/17                                 |
| DAA treatment (first treatment)                 | £10,000     | N/A                                                             | Hurley 2018 <sup>12</sup>                                   |
| DAA treatment (re-treatment)                    | £15,000     | N/A                                                             | Assumption                                                  |
| DAA treatment monitoring                        | £1,310      | Uniform(£1048, 1572)                                            | NHS reference costs 2016/17                                 |
| <b>Health state costs</b>                       |             |                                                                 |                                                             |
| Mild HCV                                        | £195        | Gamma (k=25.6995, $\theta$ =5.3698) $\times$ PPI <sup>±</sup>   | Shepherd 2007 <sup>13</sup>                                 |
| Moderate HCV                                    | £1,014      | Gamma (k=88.8502, $\theta$ =8.0698) $\times$ PPI <sup>±</sup>   | Shepherd 2007                                               |
| Compensated cirrhosis                           | £1,610      | Gamma (k=24.2342, $\theta$ =46.9584) $\times$ PPI <sup>±</sup>  | Shepherd 2007                                               |
| Decompensated cirrhosis                         | £12,901     | Gamma (k=36.0249, $\theta$ =253.1582) $\times$ PPI <sup>±</sup> | Shepherd 2007                                               |

|                                          |         |                                                                 |                                |
|------------------------------------------|---------|-----------------------------------------------------------------|--------------------------------|
| Hepatocellular carcinoma                 | £11,496 | Gamma (k=18.1081, $\theta=448.8045$ ) $\times$ PPI <sup>±</sup> | Shepherd 2007                  |
| Liver transplant (per transplant)        | £38,661 | Gamma (k=89.7536, $\theta=304.5004$ ) $\times$ PPI <sup>±</sup> | Shepherd 2007                  |
| Cost of care in year of liver transplant | £13,379 | Gamma (k=13.7788, $\theta=686.4168$ ) $\times$ PPI <sup>±</sup> | Shepherd 2007                  |
| Cost of care post liver transplant       | £1,959  | Gamma (k=15.2189, $\theta=91.0053$ ) $\times$ PPI <sup>±</sup>  | Shepherd 2007                  |
| Mild SVR                                 | £286    | Gamma (k=25, $\theta=8.08$ ) $\times$ PPI <sup>±</sup>          | Grishchenko 2009 <sup>14</sup> |
| Moderate SVR                             | £349    | Gamma (k=25, $\theta=9.88$ ) $\times$ PPI <sup>±</sup>          | Grishchenko 2009               |
| Compensated cirrhosis SVR                | £618    | Gamma (k=25, $\theta=17.48$ ) $\times$ PPI <sup>±</sup>         | Grishchenko 2009               |

<sup>^</sup> Cost of test calculated by using a multiplier for tests costs, following a uniform distribution from 0.8 to 1.2.

<sup>#</sup> Cost of staff calculated by using a multiplier for staff costs, following a uniform distribution from 0.8 to 1.2.

<sup>±</sup> Costs inflated to 2016/17 costs using Hospital and Community Health Services Pay and Prices Inflation Index to 2016/17 (2002/03 = 1.41, 2006/07 = 1.21)

## Utilities

Utilities for mild, moderate and cirrhotic health states were derived from the UK mild HCV trial (**Table S6**)<sup>15</sup>. Utilities associated with SVR health states were derived from the same source, with an assumption on the utility increment associated made for the cirrhosis SVR health state (similar assumptions have been made in previous economic evaluations). For later disease stages, utilities were derived from a UK study in individuals receiving liver transplants.<sup>16</sup> These utilities have been used in a previous health technology assessment<sup>13</sup> and have been used in many economic evaluations of HCV. Utilities were also adjusted to decline with age, in line with UK utility values amongst the general population.

A scenario was performed shown in the main results in which the utility values were decreased by 18% (i.e. using a 0.82 multiplier) to reflect the lower utility associated amongst PWID without chronic HCV (utility of 0.76), compared to equivalent, age matched, general population norms (utility of 0.93), to estimate the difference utility values between the two groups.<sup>17</sup> Similar analyses of lower utilities amongst PWID have been performed previously.<sup>18</sup>

**Table S6: Health state utilities**

| Health state                        | Value | Distribution                                  | Source                       |
|-------------------------------------|-------|-----------------------------------------------|------------------------------|
| Mild HCV                            | 0.77  | Beta ( $\alpha=521.2375$ , $\beta=155.6943$ ) | Wright 2006 <sup>15</sup>    |
| Moderate HCV                        | 0.66  | Beta ( $\alpha=168.2461$ , $\beta=86.6723$ )  | Wright 2006                  |
| Compensated cirrhosis               | 0.55  | Beta ( $\alpha=47.1021$ , $\beta=38.5381$ )   | Wright 2006                  |
| Decompensated cirrhosis             | 0.45  | Beta ( $\alpha=123.75$ , $\beta=151.25$ )     | Ratcliffe 2002 <sup>16</sup> |
| HCC                                 | 0.45  | Beta ( $\alpha=123.75$ , $\beta=151.25$ )     | Ratcliffe 2002               |
| Liver transplant (first year)       | 0.45  | Beta ( $\alpha=123.75$ , $\beta=151.25$ )     | Ratcliffe 2002               |
| Liver transplant (after first year) | 0.67  | Beta ( $\alpha=32$ , $\beta=16$ )             | Ratcliffe 2002               |
| Mild SVR                            | 0.82  | Beta ( $\alpha=65.8678$ , $\beta=14.4588$ )   | Wright 2006                  |
| Moderate SVR                        | 0.72  | Beta ( $\alpha=58.0608$ , $\beta=22.5792$ )   | Wright 2006                  |
| Compensated cirrhosis SVR           | 0.61  | Beta ( $\alpha=58.0476$ , $\beta=37.1124$ )   | Hartwell 2011 <sup>19</sup>  |

HCC: Hepatocellular carcinoma

## Transition probabilities

The transition probabilities used in the base case are presented in **Table S7**. These transition probabilities were similar to those used in a previous HTA in HCV<sup>13</sup>, with additional transitions introduced for those achieving SVR with compensated cirrhosis, who remain at risk of developing decompensated cirrhosis and HCC (at a reduced probability).

A scenario analysis was performed, shown below, to consider the uncertainty in disease progression, based on transition probabilities estimated from a back-calculation model performed in England, for

transition probabilities from mild HCV, moderate HCV and compensated cirrhosis health states (**Table S8**). The methodological details of the back-calculation model have been described elsewhere, but the model uses hospital episode statistics (HES) and office of national statistics data (ONS) to estimate historical HCV burden in England, and to then project these estimates forward<sup>20</sup>. The transition probabilities from this method are generated through a Bayesian model fitting process, and transition probabilities are differ by age.

**Table S7: Transition probabilities used in the economic model**

| <b>Transition probability</b>             | <b>Value</b> | <b>Distribution</b>                          | <b>Source</b>                   |
|-------------------------------------------|--------------|----------------------------------------------|---------------------------------|
| Mild HCV to moderate HCV                  | 0.025        | Beta ( $\alpha=38.086$ , $\beta=1485.4$ )    | Shepherd 2007 <sup>13</sup>     |
| Moderate HCV to CC                        | 0.037        | Beta ( $\alpha=26.905$ , $\beta=700.3$ )     | Shepherd 2007                   |
| CC to DC                                  | 0.039        | Beta ( $\alpha=14.617$ , $\beta=360.2$ )     | Shepherd 2007                   |
| CC to HCC                                 | 0.014        | Beta ( $\alpha=1.9326$ , $\beta=136.1$ )     | Shepherd 2007                   |
| CC SVR to DC (relative risk vs. non-SVR)  | 0.07         | Lognormal (95% CI 0.03, 0.2)                 | Van der Meer 2012 <sup>21</sup> |
| CC SVR to HCC (relative risk vs. non-SVR) | 0.23         | Lognormal (95% CI 0.16, 0.35)                | Morgan 2013 <sup>22</sup>       |
| DC to HCC                                 | 0.014        | Beta ( $\alpha=1.9326$ , $\beta=136.1074$ )  | Shepherd 2007                   |
| DC to liver transplant (LT)               | 0.03         | Beta ( $\alpha=6.5256$ , $\beta=210.9945$ )  | Shepherd 2007                   |
| DC to death                               | 0.13         | Beta ( $\alpha=147.03$ , $\beta=983.97$ )    | Shepherd 2007                   |
| HCC to LT                                 | 0.03         | Beta ( $\alpha=6.5256$ , $\beta=210.9945$ )  | Shepherd 2007                   |
| HCC to death                              | 0.43         | Beta ( $\alpha=117.1033$ , $\beta=155.23$ )  | Shepherd 2007                   |
| Post LT (0-12 months) to death            | 0.21         | Beta ( $\alpha=16.2762$ , $\beta=61.2294$ )  | Shepherd 2007                   |
| Post LT (>12 months) to death             | 0.057        | Beta ( $\alpha=22.9017$ , $\beta=378.8825$ ) | Shepherd 2007                   |

CC: Compensated cirrhosis, DC: Decompensated cirrhosis, HCC: Hepatocellular carcinoma, LT: Liver transplant

**Table S8: Transition probabilities derived from the posterior estimates of a back-calculation model for England (used in scenario analysis)**

| Health state                          | Age   | Value |
|---------------------------------------|-------|-------|
| Mild HCV to moderate HCV              | 30-39 | 0.025 |
|                                       | 40-49 | 0.042 |
|                                       | 50-59 | 0.129 |
|                                       | 60-69 | 0.110 |
|                                       | 70+   | 0.130 |
| Moderate HCV to compensated cirrhosis | 30-39 | 0.062 |
|                                       | 40-49 | 0.068 |
|                                       | 50-59 | 0.089 |
|                                       | 60-69 | 0.062 |
|                                       | 70+   | 0.081 |
| Compensated cirrhosis to DC           | 30-39 | 0.133 |
|                                       | 40-49 | 0.106 |
|                                       | 50-59 | 0.088 |
|                                       | 60-69 | 0.082 |
|                                       | 70+   | 0.082 |
| Compensated cirrhosis to HCC          | 30-39 | 0.004 |
|                                       | 40-49 | 0.007 |
|                                       | 50-59 | 0.017 |
|                                       | 60-69 | 0.039 |
|                                       | 70+   | 0.044 |

DC: Decompensated cirrhosis, HCC: Hepatocellular carcinoma

Source: Harris et al 2019 <sup>4</sup>

### Sensitivity analyses

We undertook deterministic one-way sensitivity analyses by varying one parameter and observing the influence upon the ICER. First, we assumed that linkage to care for each arm was equal based on a weighted average of the overall linkage to care. Second, we halved estimated HCV treatment cost to £5,000 per course of DAA treatment (£10,000 for retreatment). Third, as there was no information on injecting status of those identified we did not model disease transmission in the baseline model, but we did consider the impact of lower utility values associated with people who inject drugs (PWID) and a threshold analysis considering reinfection<sup>17</sup>. Fourth, we considered the possibility of differential yield in testing based on study data. Fifth, an additional scenario assumed the proportion of RNA positive tests was derived from PHE sentinel surveillance data (72.3)<sup>8</sup>. Sixth, we considered alternative progression rates based on a recent back-calculation model performed in England<sup>4</sup>. The first three scenarios are shown in the main results Table 5, the last three are shown below in Table S9.

The main results show our threshold analysis of the intervention effect on the rate ratio of antibody testing, assuming that linkage to care was equal for control and intervention practices. In this scenario the intervention remains cost-effective as long as the intervention effect of increases HCV antibody testing by at least 53% and the annual reinfection rate was equal to or less than 9.1% per year.

We also performed a one-way sensitivity analysis across a range of DAA treatment costs, due to the uncertainty in this parameter (Figure S2A). Probabilistic sensitivity analysis (PSA) was performed by sampling all probabilistic parameters simultaneously in the model, across 10,000 simulations. We performed an analysis of covariance (ANCOVA) to consider the percentage of change in incremental costs and incremental QALYs explained by the uncertainty in each parameter (or group of parameters). We performed threshold analyses to consider the parameter values at which the decision upon which the cost-effectiveness decision changes, at a £20,000 willingness to pay threshold. We considered the minimum increase in antibody testing required, and the maximum reinfection rate below which, the intervention would remain cost-effective.

The main source of variation in the probabilistic model costs is due to the cost of screening per patient, accounting for 48% of the uncertainty in the estimated costs and the main source of uncertainty in the estimated QALYs is due to probability of referral and attendance (54%) and utility increment associated with achieving SVR (24%) (see Figure S2B).

**Figure S2A: Incremental cost-effectiveness ratio across various DAA treatment costs**

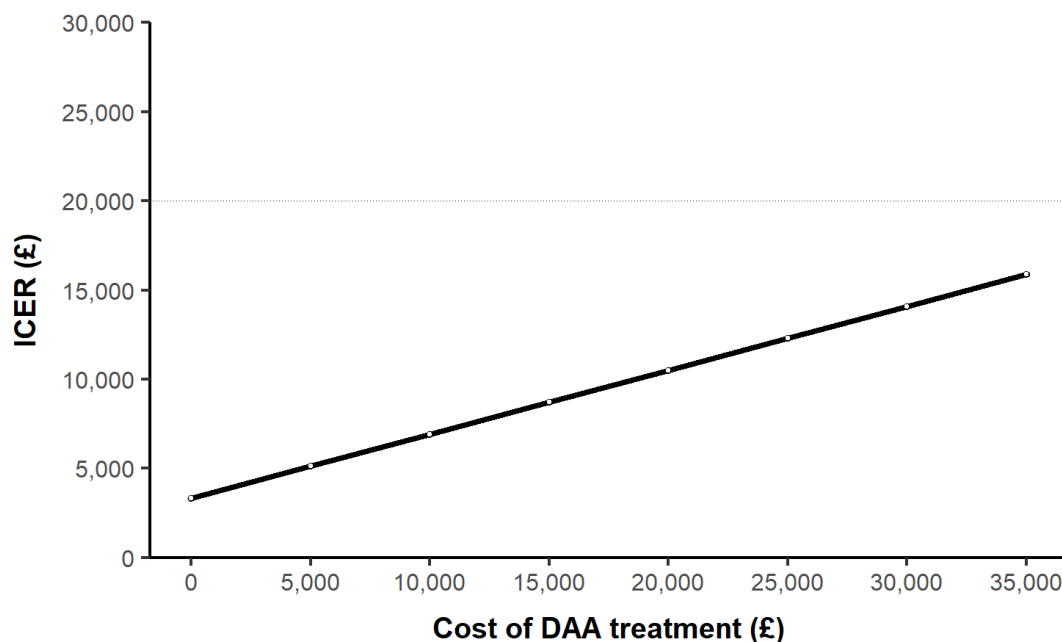

**Figure S2B: Analysis of covariance (ANCOVA) for probabilistic sensitivity analysis**

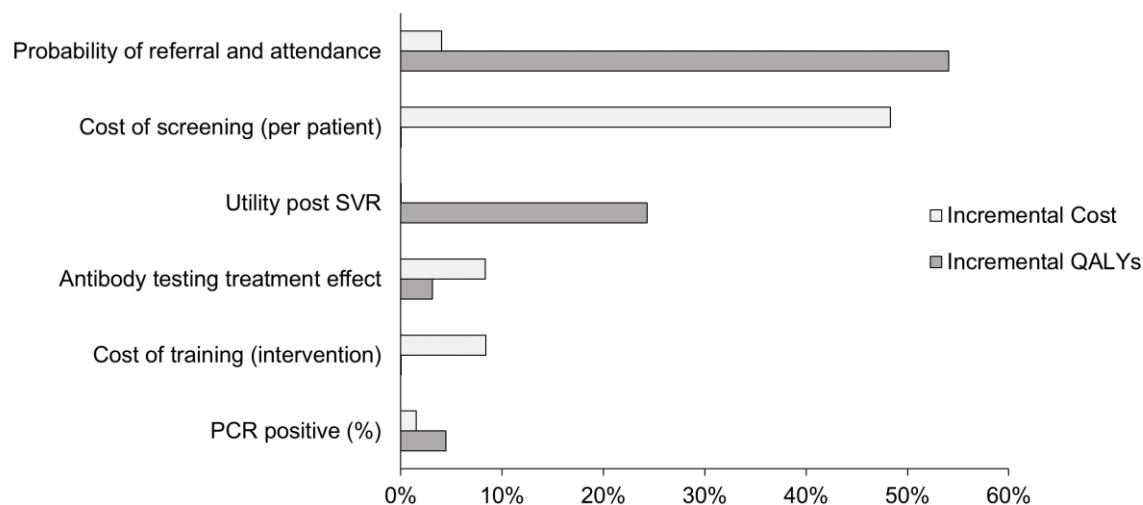

**Table S9: Additional scenario analysis results per individual identified as high risk by HepCATT intervention**

| Testing option                                                                               | Total costs | Total QALYs | Incr. costs | Incr. QALYs | ICER   |
|----------------------------------------------------------------------------------------------|-------------|-------------|-------------|-------------|--------|
| <b>Base case results</b>                                                                     |             |             |             |             |        |
| Control arm                                                                                  | £417        | 16.2207     |             |             |        |
| Intervention arm                                                                             | £424        | 16.2218     | £7.45       | 0.00108     | £6,916 |
| <b>Scenario: Treatment effect for higher yield of antibody positives in intervention arm</b> |             |             |             |             |        |
| Control arm                                                                                  | £417        | 16.2207     |             |             |        |
| Intervention arm                                                                             | £429        | 16.2223     | £12.14      | 0.00159     | £7,635 |
| <b>Scenario: PCR results from PHE RNA positive statistics (rather than with trial)</b>       |             |             |             |             |        |
| Control arm                                                                                  | £732        | 16.1298     |             |             |        |
| Intervention arm                                                                             | £742        | 16.1318     | £10.43      | 0.00193     | £5,396 |
| <b>Scenario: Transition probabilities derived from back-calculation model</b>                |             |             |             |             |        |
| Control arm                                                                                  | £655        | 16.1843     |             |             |        |
| Intervention arm                                                                             | £658        | 16.1862     | £2.13       | 0.00196     | £1,089 |



#### IV: HepCATT Study Algorithm (Read Codes)

| Name                                                                                                                                                                                                                                                                                                                                                                                                                                                                                                                                                                                                                                                                                                                                                                                                                                                                                                                                                                                                                                                                                                                                                                                                                                                                               | IDU                                 |
|------------------------------------------------------------------------------------------------------------------------------------------------------------------------------------------------------------------------------------------------------------------------------------------------------------------------------------------------------------------------------------------------------------------------------------------------------------------------------------------------------------------------------------------------------------------------------------------------------------------------------------------------------------------------------------------------------------------------------------------------------------------------------------------------------------------------------------------------------------------------------------------------------------------------------------------------------------------------------------------------------------------------------------------------------------------------------------------------------------------------------------------------------------------------------------------------------------------------------------------------------------------------------------|-------------------------------------|
| Description                                                                                                                                                                                                                                                                                                                                                                                                                                                                                                                                                                                                                                                                                                                                                                                                                                                                                                                                                                                                                                                                                                                                                                                                                                                                        | History of Intravenous Drug use     |
| Selection                                                                                                                                                                                                                                                                                                                                                                                                                                                                                                                                                                                                                                                                                                                                                                                                                                                                                                                                                                                                                                                                                                                                                                                                                                                                          | Latest                              |
| Referenced by sections                                                                                                                                                                                                                                                                                                                                                                                                                                                                                                                                                                                                                                                                                                                                                                                                                                                                                                                                                                                                                                                                                                                                                                                                                                                             |                                     |
| Referenced by measures                                                                                                                                                                                                                                                                                                                                                                                                                                                                                                                                                                                                                                                                                                                                                                                                                                                                                                                                                                                                                                                                                                                                                                                                                                                             | Call01, Off01, Tst01, Ref01, Refe01 |
| Read V2 Terms                                                                                                                                                                                                                                                                                                                                                                                                                                                                                                                                                                                                                                                                                                                                                                                                                                                                                                                                                                                                                                                                                                                                                                                                                                                                      | CTV3 Terms                          |
| <p>13c0: Injecting drug user</p> <p>13c1: Intravenous drug user</p> <p>13c7: Current drug user</p> <p>13cJ: Previously injecting drug user</p> <p>146C: Failed heroin detoxification</p> <p>1T0%: H/O heroin misuse</p> <p>1TE: Uses heroin on top of substitution therapy</p> <p>1TF: Does not use heroin on top of substitution therapy</p> <p>E240: Opioid type drug dependence</p> <p>Eu112: [X]Mental and behav dis due to use opioids: dependence syndr</p> <p>SL501: Heroin poisoning</p> <p>T800: Accidental poisoning by heroin</p> <p>TJ50: Adverse reaction to heroin, diamorphine</p> <p>U1A5: [X]Accident poisoning/exposure to narcotic drug</p> <p>U205: [X]Intent self poison/exposure to narcotic drug</p> <p>13c4: Intranasal drug user</p> <p>1V3C: Shares needles</p> <p>1V65: Heroin misuse</p> <p>1V3M: Does not use needle and syringe exchange scheme</p> <p>1V32: Neck injector</p> <p>1V3B: Shares syringes</p> <p>1V33: Groin injector</p> <p>1V3G: Does not clean needles</p> <p>1V35: Shares drug equipment</p> <p>1V38: Sharing of drug injecting equipment</p> <p>HMPNQDR1: "HMPNQDR1"</p> <p>ZV115: [V]Personal history of drug abuse by injection</p> <p>EMISNQCU1: "EMISNQCU1"</p> <p>EMISNQPR6: "EMISNQPR6"</p> <p>EMISNQND10: "EMISNQND10"</p> |                                     |

|                                                                                                                                                                                                                                                                                                                                                                                                                                                                                                                                                                                                                                                                                                                                                                                                                                                                                               |  |
|-----------------------------------------------------------------------------------------------------------------------------------------------------------------------------------------------------------------------------------------------------------------------------------------------------------------------------------------------------------------------------------------------------------------------------------------------------------------------------------------------------------------------------------------------------------------------------------------------------------------------------------------------------------------------------------------------------------------------------------------------------------------------------------------------------------------------------------------------------------------------------------------------|--|
| <p>EMISNQHO4: "EMISNQHO4"<br/> EMISNQMI10: "EMISNQMI10"<br/> 13c5: Substance misuse increased<br/> 13c6: Substance misuse decreased<br/> 13c8: Reduced drugs misuse<br/> 13c9: Subcutaneous drug user<br/> 13cC: Continuous use of drugs<br/> 13cD: Episodic use of drugs<br/> 13cF: Preoccupied with substance misuse<br/> 13cF: Preoccupied with substance misuse<br/> 13cH: Persistent substance misuse<br/> 13cM: Substance misuse<br/> 13cN: Has never shared drug injection equipment<br/> 146F: H/O: drug abuse<br/> E248: Combined opioid with other drug dependence<br/> 8FB: Drug rehabilitation<br/> 8FB0: Drug detoxification programme completed<br/> 1283: FH: Drug dependency<br/> 1463: H/O: drug dependency<br/> 1J11: Suspected abuse hard drugs<br/> 1V0: Misuses drugs<br/> 1V3%: Drug injection behaviour<br/> 1V65: Heroin misuse<br/> 1P31: Compulsive drug taking</p> |  |
|-----------------------------------------------------------------------------------------------------------------------------------------------------------------------------------------------------------------------------------------------------------------------------------------------------------------------------------------------------------------------------------------------------------------------------------------------------------------------------------------------------------------------------------------------------------------------------------------------------------------------------------------------------------------------------------------------------------------------------------------------------------------------------------------------------------------------------------------------------------------------------------------------|--|

|                                                                                                                                                                                                                                                                                                                                                                                                          |                                                                          |
|----------------------------------------------------------------------------------------------------------------------------------------------------------------------------------------------------------------------------------------------------------------------------------------------------------------------------------------------------------------------------------------------------------|--------------------------------------------------------------------------|
| Name                                                                                                                                                                                                                                                                                                                                                                                                     | OPIATE_RX                                                                |
| Description                                                                                                                                                                                                                                                                                                                                                                                              | Methadone or buprenorphine prescriptions (excluding patches and tablets) |
| Selection                                                                                                                                                                                                                                                                                                                                                                                                | Latest                                                                   |
| Referenced by sections                                                                                                                                                                                                                                                                                                                                                                                   |                                                                          |
| Referenced by measures                                                                                                                                                                                                                                                                                                                                                                                   | Call02, Off02, Tst02, Ref02, Refe02                                      |
| Read V2 Terms                                                                                                                                                                                                                                                                                                                                                                                            | CTV3 Terms                                                               |
| <p>djc%: METHADONE HCL [ANALGESIC]<br/> dj32: TEMGESIC 300micrograms/1mL injection<br/> dj33: TEMGESIC 600microgram/2mL injection<br/> dj3y: BUPRENORPHINE 300microgram/1mL injection<br/> dj3z: BUPRENORPHINE 600micrograms/2mL injection<br/> dj3D: BUPRENORPHINE+NALOXONE 2mg/0.5mg sublingual tablets<br/> dj3E: SUBOXONE 2mg/0.5mg sublingual tablets<br/> dj3F: BUPRENORPHINE+NALOXONE 8mg/2mg</p> |                                                                          |

|                                                                                                                                      |  |
|--------------------------------------------------------------------------------------------------------------------------------------|--|
| sublingual tablets<br>dj3G: SUBOXONE 8mg/2mg sublingual tablets<br>djcA: METHADONE DILUENT liquid<br>cg51: METHADONE 2mg/5mL linctus |  |
|--------------------------------------------------------------------------------------------------------------------------------------|--|

|                                                                                                                                                                                                                                                                                                                                                                                                                                                                                                                                                                                                                                                                                                                                                                                       |                                     |
|---------------------------------------------------------------------------------------------------------------------------------------------------------------------------------------------------------------------------------------------------------------------------------------------------------------------------------------------------------------------------------------------------------------------------------------------------------------------------------------------------------------------------------------------------------------------------------------------------------------------------------------------------------------------------------------------------------------------------------------------------------------------------------------|-------------------------------------|
| Name                                                                                                                                                                                                                                                                                                                                                                                                                                                                                                                                                                                                                                                                                                                                                                                  | OPIATE_MISUSE                       |
| Description                                                                                                                                                                                                                                                                                                                                                                                                                                                                                                                                                                                                                                                                                                                                                                           | Opiate misuse                       |
| Selection                                                                                                                                                                                                                                                                                                                                                                                                                                                                                                                                                                                                                                                                                                                                                                             | Latest                              |
| Referenced by sections                                                                                                                                                                                                                                                                                                                                                                                                                                                                                                                                                                                                                                                                                                                                                                |                                     |
| Referenced by measures                                                                                                                                                                                                                                                                                                                                                                                                                                                                                                                                                                                                                                                                                                                                                                | Call02, Off02, Tst02, Ref02, Refe02 |
| Read V2 Terms                                                                                                                                                                                                                                                                                                                                                                                                                                                                                                                                                                                                                                                                                                                                                                         | CTV3 Terms                          |
| 13cG0: Opioid tolerant<br>13cG1: Opioid naive<br>4I71: Oral fluid opiate level<br>1T1%: H/O methadone misuse<br>44u1: Serum methadone level<br>44uK: Plasma methadone level<br>46QB: Urine methadone<br>46Qf: Urine methadone metabolite level<br>4I75: Oral fluid methadone level<br>8B23: Drug addiction therapy<br>8B2N: Drug addiction detoxification therapy -<br>methadone<br>8B2P: Drug addiction maintenance therapy -<br>methadone<br>8BE0: Reinduction to methadone maintenance<br>therapy<br>SL502: Methadone poisoning<br>T801: Accidental poisoning by methadone<br>TJ51: Adverse reaction to methadone<br>U6050: [X]Opioids + relat analgesics caus advers eff<br>in therap use<br>R10B4: [D]Finding of opiate drug in blood<br>679j0: Education about taking methadone |                                     |

|                                                                  |                                     |
|------------------------------------------------------------------|-------------------------------------|
| Name                                                             | BLOOD_1991                          |
| Description                                                      | Blood transfusion prior to 1991     |
| Selection                                                        | Latest before 1 Jan 1991            |
| Referenced by sections                                           |                                     |
| Referenced by measures                                           | Call03, Off03, Tst03, Ref03, Refe03 |
| Read V2 Terms                                                    | CTV3 Terms                          |
| 14S1: H/O: blood transfusion<br>435: Transfusion centre ref. no. |                                     |

|                                                                                                                                                                                                                                                                                                                                                                                                                                                                                                                                                                                                                                                                                                                                                                                                                                                                                                                                                                                                                                                                                                                                                                                                                                                                                                                                                                                                                                                                                                                      |  |
|----------------------------------------------------------------------------------------------------------------------------------------------------------------------------------------------------------------------------------------------------------------------------------------------------------------------------------------------------------------------------------------------------------------------------------------------------------------------------------------------------------------------------------------------------------------------------------------------------------------------------------------------------------------------------------------------------------------------------------------------------------------------------------------------------------------------------------------------------------------------------------------------------------------------------------------------------------------------------------------------------------------------------------------------------------------------------------------------------------------------------------------------------------------------------------------------------------------------------------------------------------------------------------------------------------------------------------------------------------------------------------------------------------------------------------------------------------------------------------------------------------------------|--|
| <p>7K1Q2: Transfusion of stem cells</p> <p>7L13: Exchange blood transfusion</p> <p>7L13y: Other specified exchange blood transfusion</p> <p>7L13z: Exchange blood transfusion NOS</p> <p>7L14-7L143: Other blood transfusion ... Intravenous blood transfusion NEC</p> <p>7L14y: Other specified other blood transfusion</p> <p>7L14z: Other blood transfusion NOS</p> <p>7L15%: Other intravenous transfusion</p> <p>!7L156: (Excluding) Plasmapheresis</p> <p>88: Cardiovascular procedures</p> <p>9bC1: Blood transfusion (specialty)</p> <p>SP33: Infection after injection/infusion/transfusion/vaccination</p> <p>SP332: Infection after transfusion</p> <p>SP33z: Infection after injection/infusion/transfusion/vacc NOS</p> <p>SP38: Other transfusion reaction</p> <p>SP380: Septic shock due to transfusion</p> <p>SP38z: Transfusion reaction NOS</p> <p>TA30: Excess blood or other fluid during transfusion or infusion</p> <p>TA41: Mechanical failure of apparatus during infusion/transfusion</p> <p>TA411: Mechanical failure of apparatus during transfusion</p> <p>TA41z: Mechanical failure of apparatus - infusion/transfusion NOS</p> <p>TB1y0: Blood transfusion with complication, without blame</p> <p>ZV582: [V]Blood transfusion, without reported diagnosis</p> <p>ZVu3M: [X]Blood transfusion, without reported diagnosis</p> <p>G8y00: Extravasation following blood transfusion</p> <p>TJ47z: Adverse reaction to blood or blood products NOS</p> <p>ZVu3V: [X]Blood transfusion</p> |  |
|----------------------------------------------------------------------------------------------------------------------------------------------------------------------------------------------------------------------------------------------------------------------------------------------------------------------------------------------------------------------------------------------------------------------------------------------------------------------------------------------------------------------------------------------------------------------------------------------------------------------------------------------------------------------------------------------------------------------------------------------------------------------------------------------------------------------------------------------------------------------------------------------------------------------------------------------------------------------------------------------------------------------------------------------------------------------------------------------------------------------------------------------------------------------------------------------------------------------------------------------------------------------------------------------------------------------------------------------------------------------------------------------------------------------------------------------------------------------------------------------------------------------|--|

|                        |                                     |
|------------------------|-------------------------------------|
| Name                   | PRODUCT_1986                        |
| Description            | Blood products before 1986          |
| Selection              | Latest before 1 Jan 1986            |
| Referenced by sections |                                     |
| Referenced by measures | Call04, Off04, Tst04, Ref04, Refe04 |

| Read V2 Terms                                                                                                                                                                                                                                                                                                                                                                                                                                | CTV3 Terms |
|----------------------------------------------------------------------------------------------------------------------------------------------------------------------------------------------------------------------------------------------------------------------------------------------------------------------------------------------------------------------------------------------------------------------------------------------|------------|
| 7L141: Intravenous blood transfusion of packed cells<br>7L142: Intravenous blood transfusion of platelets<br>7L154: Transfusion of platelets NEC<br>7L150: Transfusion of coagulation factor<br>7L151: Transfusion of plasma<br>7L158: Transfusion of plasma NEC<br>7L152: Transfusion of serum NEC<br>TJ470: Adverse reaction to blood plasma<br>TJ471: Adverse reaction to human fibrinogen<br>TJ472: Adverse reaction to packed red cells |            |

|                        |                                     |
|------------------------|-------------------------------------|
| Name                   | TRANSP_1992                         |
| Description            | Transplant before 1992              |
| Selection              | Latest                              |
| Referenced by sections |                                     |
| Referenced by measures | Call05, Off05, Tst05, Ref05, Refe05 |

| Read V2 Terms                                                                                                                                                                                                                                                                                                                                                                                                                                                                                                                                                                                                                                                                                                                                                                                                                                                                                                                                                                                          | CTV3 Terms |
|--------------------------------------------------------------------------------------------------------------------------------------------------------------------------------------------------------------------------------------------------------------------------------------------------------------------------------------------------------------------------------------------------------------------------------------------------------------------------------------------------------------------------------------------------------------------------------------------------------------------------------------------------------------------------------------------------------------------------------------------------------------------------------------------------------------------------------------------------------------------------------------------------------------------------------------------------------------------------------------------------------|------------|
| 8HBB: Transplant follow-up<br>7B015: Transplant nephrectomy<br>9b8K: Transplantation surgery<br>7450: Transplantation of lung<br>7800: Transplantation of liver<br>764C: Transplantation of ileum<br>7B00: Transplantation of kidney<br>78420: Transplantation of spleen<br>7830: Transplantation of pancreas<br>7901: Other transplantation of heart<br>9b8B2: Cardiothoracic transplantation<br>SP080: Transplanted organ failure<br>SP081: Transplanted organ rejection<br>SP083-SP086: Kidney transplant failure and rejection ... Liver transplant failure and rejection<br>SP089: Complication of transplanted lung<br>SP08C-SP08H: Accelerated rejection of renal transplant ... Acute rejection of renal transplant<br>SP08Z: Thrombosis of artery of transplanted kidney<br>ZV420: [V]Kidney transplanted<br>ZV421: [V]Heart transplanted<br>ZV426: [V]Lung transplanted<br>ZV427: [V]Liver transplanted<br>7B063: Exploration of renal transplant<br>7900: Transplantation of heart and lung |            |

|                                                                                                    |  |
|----------------------------------------------------------------------------------------------------|--|
| HNG0111: "HNG0111"<br>78052: Exploration of liver<br>8HkP: Referral to surgical transplant service |  |
|----------------------------------------------------------------------------------------------------|--|

|                                                                                                                                                                                                                                                                                                                                                                                                                                                                                                                                                                                                                                                                                                                                                                                                                                                                                                                                                                                                                                                 |                                     |
|-------------------------------------------------------------------------------------------------------------------------------------------------------------------------------------------------------------------------------------------------------------------------------------------------------------------------------------------------------------------------------------------------------------------------------------------------------------------------------------------------------------------------------------------------------------------------------------------------------------------------------------------------------------------------------------------------------------------------------------------------------------------------------------------------------------------------------------------------------------------------------------------------------------------------------------------------------------------------------------------------------------------------------------------------|-------------------------------------|
| Name                                                                                                                                                                                                                                                                                                                                                                                                                                                                                                                                                                                                                                                                                                                                                                                                                                                                                                                                                                                                                                            | HIV                                 |
| Description                                                                                                                                                                                                                                                                                                                                                                                                                                                                                                                                                                                                                                                                                                                                                                                                                                                                                                                                                                                                                                     | Infection with HIV                  |
| Selection                                                                                                                                                                                                                                                                                                                                                                                                                                                                                                                                                                                                                                                                                                                                                                                                                                                                                                                                                                                                                                       | Latest                              |
| Referenced by sections                                                                                                                                                                                                                                                                                                                                                                                                                                                                                                                                                                                                                                                                                                                                                                                                                                                                                                                                                                                                                          |                                     |
| Referenced by measures                                                                                                                                                                                                                                                                                                                                                                                                                                                                                                                                                                                                                                                                                                                                                                                                                                                                                                                                                                                                                          | Call06, Off06, Tst06, Ref06, Refe06 |
| Read V2 Terms                                                                                                                                                                                                                                                                                                                                                                                                                                                                                                                                                                                                                                                                                                                                                                                                                                                                                                                                                                                                                                   | CTV3 Terms                          |
| 43C3: HTLV-3 antibody positive<br>4J34: HIV viral load<br>A789: Human immunodef virus resulting in other disease<br>A788: Acquired immune deficiency syndrome<br>66j: Human immunodeficiency virus monitoring<br>Eu024: [X]Dementia in human immunodef virus [HIV] disease<br>4J3F: Human immunodeficiency virus viral load by log rank<br>L179: HIV disease complicating pregnancy childbirth puerperium<br>R109: [D]Laboratory evidence of human immunodeficiency virus [HIV]<br>43h9: HIV proviral deoxyribonucleic acid polymerase chain reaction<br>ZV01A: [V]Asymptomatic human immunodeficiency virus infection status<br>9kl: HIV pos gen health check serv declind - enhanc service admin<br>EGTON41: "EGTON41"<br>EMISNQHO13: "EMISNQHO13"<br>AyuC: [X]Human immunodeficiency virus disease<br>HNG0143: "HNG0143"<br>HNG0607: "HNG0607"<br>43j7: HIV 1 nucleic acid detection<br>A788: Acquired immune deficiency syndrome<br>66j%: Human immunodeficiency virus monitoring<br>A789: Human immunodef virus resulting in other disease |                                     |

|             |                            |
|-------------|----------------------------|
| Name        | HEP_B                      |
| Description | Infection with Hepatitis B |
| Selection   | Latest                     |

|                                                                                                                                                                                                                                                                                                                                                                                                                                                                                                                                       |                                     |
|---------------------------------------------------------------------------------------------------------------------------------------------------------------------------------------------------------------------------------------------------------------------------------------------------------------------------------------------------------------------------------------------------------------------------------------------------------------------------------------------------------------------------------------|-------------------------------------|
| Referenced by sections                                                                                                                                                                                                                                                                                                                                                                                                                                                                                                                |                                     |
| Referenced by measures                                                                                                                                                                                                                                                                                                                                                                                                                                                                                                                | Call07, Off07, Tst07, Ref07, Refe07 |
| Read V2 Terms                                                                                                                                                                                                                                                                                                                                                                                                                                                                                                                         | CTV3 Terms                          |
| 141E: History of hepatitis B<br>4J3D: Hepatitis B viral load<br>ZV02B: [V]Hepatitis B carrier<br>43B4: Hepatitis B surface antig +ve<br>7Q052: Hepatitis B treatment drugs Band 1<br>9kZ: Hepatitis B screening positive - enhanced services admin<br>A703: Viral (serum) hepatitis B<br>Q4091: Congenital hepatitis B infection<br>A7071: Chronic viral hepatitis B without delta-agent<br>EMISNQHO3: "EMISNQHO3"<br>A7070: Chronic viral hepatitis B with delta-agent<br>A7051: Acute delta-(super)infection of hepatitis B carrier |                                     |

|                                                                                                                                                                                                                                                                                                                                                                                                                                             |                                     |
|---------------------------------------------------------------------------------------------------------------------------------------------------------------------------------------------------------------------------------------------------------------------------------------------------------------------------------------------------------------------------------------------------------------------------------------------|-------------------------------------|
| Name                                                                                                                                                                                                                                                                                                                                                                                                                                        | HCV_MA                              |
| Description                                                                                                                                                                                                                                                                                                                                                                                                                                 | Born to mother with HCV             |
| Selection                                                                                                                                                                                                                                                                                                                                                                                                                                   | Latest                              |
| Referenced by sections                                                                                                                                                                                                                                                                                                                                                                                                                      |                                     |
| Referenced by measures                                                                                                                                                                                                                                                                                                                                                                                                                      | Call08, Off08, Tst08, Ref08, Refe08 |
| Read V2 Terms                                                                                                                                                                                                                                                                                                                                                                                                                               | CTV3 Terms                          |
| 4JQD: Hepatitis C viral ribonucleic acid PCR positive<br>4JQF: Hepatitis C antigen positive<br>9NgR: On hepatitis C treatment plan<br>9kV: Hepatitis C screening positive - enhanced services admin<br>A70z0: Hepatitis C<br>EMISNQHE6: "EMISNQHE6"<br>ZV02C: [V]Hepatitis C carrier<br>A7072: Chronic viral hepatitis C<br>EMISNQHE11: "EMISNQHE11"<br>EMISNQHE29: "EMISNQHE29"<br>A70A: Hepatitis C genotype 1<br>A70G: Acute hepatitis C |                                     |

|                        |                                     |
|------------------------|-------------------------------------|
| Name                   | CHILD_CARE                          |
| Description            | Child in care                       |
| Selection              | Latest                              |
| Referenced by sections |                                     |
| Referenced by measures | Call09, Off09, Tst09, Ref09, Refe09 |

|                                                                                                                                                                                                                                                                 |            |
|-----------------------------------------------------------------------------------------------------------------------------------------------------------------------------------------------------------------------------------------------------------------|------------|
| Read V2 Terms                                                                                                                                                                                                                                                   | CTV3 Terms |
| 13IB0: Child in foster care<br>6A50: Child in care statutory review meeting<br>13li: Subject to care order under Children Act 1989<br>9Ngz9: In transition from children's to adult care service<br>13lj: Subject to interim care order under Children Act 1989 |            |

|                                                                          |                                     |
|--------------------------------------------------------------------------|-------------------------------------|
| Name                                                                     | PRISON                              |
| Description                                                              | Prison                              |
| Selection                                                                | Latest                              |
| Referenced by sections                                                   |                                     |
| Referenced by measures                                                   | Call10, Off10, Tst10, Ref10, Refe10 |
| Read V2 Terms                                                            | CTV3 Terms                          |
| 13HQ: In prison<br>13H9: Imprisonment record<br>ZV625: [V]Legal problems |                                     |

|                                                                |                                     |
|----------------------------------------------------------------|-------------------------------------|
| Name                                                           | ALTERED_ALT                         |
| Description                                                    | Altered ALT levels                  |
| Selection                                                      | Latest                              |
| Referenced by sections                                         |                                     |
| Referenced by measures                                         | Call11, Off11, Tst11, Ref11, Refe11 |
| Read V2 Terms                                                  | CTV3 Terms                          |
| 44G2: Liver enzymes abnormal<br>44G31: ALT/SGPT level abnormal |                                     |

|                                                                                                                                                                                                                                                                                          |                                     |
|------------------------------------------------------------------------------------------------------------------------------------------------------------------------------------------------------------------------------------------------------------------------------------------|-------------------------------------|
| Name                                                                                                                                                                                                                                                                                     | HCV                                 |
| Description                                                                                                                                                                                                                                                                              | Hepatitis C                         |
| Selection                                                                                                                                                                                                                                                                                | Latest                              |
| Referenced by sections                                                                                                                                                                                                                                                                   |                                     |
| Referenced by measures                                                                                                                                                                                                                                                                   | Call12, Off12, Tst12, Ref12, Refe12 |
| Read V2 Terms                                                                                                                                                                                                                                                                            | CTV3 Terms                          |
| 9kV: Hepatitis C screening positive - enhanced services admin<br>7Q053: RSV treatment and Hepatitis C treatment drugs Band 1<br>A7040: Viral hepatitis C with coma<br>A7050: Viral hepatitis C without mention of hepatic coma<br>A7072: Chronic viral hepatitis C<br>A70z0: Hepatitis C |                                     |



|                                                                                                                                                                                   |  |
|-----------------------------------------------------------------------------------------------------------------------------------------------------------------------------------|--|
| ZV02C: [V]Hepatitis C carrier<br>Q409: Congenital viral hepatitis<br>ZV026: [V]Viral hepatitis carrier<br>14i: H/O hepatitis C antiviral drug therapy<br>EMISNQHE29: "EMISNQHE29" |  |
|-----------------------------------------------------------------------------------------------------------------------------------------------------------------------------------|--|

|                        |                              |
|------------------------|------------------------------|
| Name                   | HC_TEST                      |
| Description            | Hepatitis C testing          |
| Selection              | Latest                       |
| Referenced by sections | HC_TEST, HC_TEST, HC_TEST    |
| Referenced by measures | Call12, Off12, Ref12, Refe12 |

| Read V2 Terms                                                                                                                                                                                                                                                                                                                                                                                                                                                                                                                                                                                                                                                                                                                                                                                                                                                                                                                                                                                                                                  | CTV3 Terms |
|------------------------------------------------------------------------------------------------------------------------------------------------------------------------------------------------------------------------------------------------------------------------------------------------------------------------------------------------------------------------------------------------------------------------------------------------------------------------------------------------------------------------------------------------------------------------------------------------------------------------------------------------------------------------------------------------------------------------------------------------------------------------------------------------------------------------------------------------------------------------------------------------------------------------------------------------------------------------------------------------------------------------------------------------|------------|
| 2J1: Hepatitis C status<br>2J12: Hepatitis C non immune<br>43B7: Hepatitis C non-immune<br>43dD: Hepatitis C recombinant immunoblot assay<br>43h3: Hepatitis C PCR<br>43j5: Hepatitis C nucleic acid detection<br>43k1: Hepatitis C antigen level<br>43q: Hepatitis C virus RNA assay<br>43X2: Hepatitis C antibody test<br>43X3: Hepatitis C antibody test positive<br>43X6: Hepatitis C antibody level<br>4J3B: Hepatitis C viral load<br>65PM: Hepatitis C contact<br>65Q7: Viral hepatitis carrier<br>677Q: Hepatitis C screening counselling<br>6829: Hepatitis C screening<br>4JQC: Hepatitis C viral ribonucleic acid PCR negative<br>4JQE: Hepatitis C antigen negative<br>8I3v: Hepatitis C screening declined<br>677Q: Hepatitis C screening counselling<br>43j50: Hepatitis C nucleic acid detection assay<br>9kT: Hepatitis C screening negative - enhanced services admin<br>9kR: Chronic hepatitis annual review - enhanced services admin<br>EMISNQHE30: "EMISNQHE30"<br>ZV01B: [V]Contact with and exposure to viral hepatitis |            |

|             |                              |
|-------------|------------------------------|
| Name        | HC_TEST_E                    |
| Description | Hepatitis C testing earliest |
| Selection   | Earliest                     |

|                                                                                                                                                                                                                                                                                                                                                                                                                                                                                                                                                                                                                                                                                                                                                                                                                                                                                                                                                                                                                                                |            |
|------------------------------------------------------------------------------------------------------------------------------------------------------------------------------------------------------------------------------------------------------------------------------------------------------------------------------------------------------------------------------------------------------------------------------------------------------------------------------------------------------------------------------------------------------------------------------------------------------------------------------------------------------------------------------------------------------------------------------------------------------------------------------------------------------------------------------------------------------------------------------------------------------------------------------------------------------------------------------------------------------------------------------------------------|------------|
| Referenced by sections                                                                                                                                                                                                                                                                                                                                                                                                                                                                                                                                                                                                                                                                                                                                                                                                                                                                                                                                                                                                                         |            |
| Referenced by measures                                                                                                                                                                                                                                                                                                                                                                                                                                                                                                                                                                                                                                                                                                                                                                                                                                                                                                                                                                                                                         | Tst12      |
| Read V2 Terms                                                                                                                                                                                                                                                                                                                                                                                                                                                                                                                                                                                                                                                                                                                                                                                                                                                                                                                                                                                                                                  | CTV3 Terms |
| 2J1: Hepatitis C status<br>2J12: Hepatitis C non immune<br>43B7: Hepatitis C non-immune<br>43dD: Hepatitis C recombinant immunoblot assay<br>43h3: Hepatitis C PCR<br>43j5: Hepatitis C nucleic acid detection<br>43k1: Hepatitis C antigen level<br>43q: Hepatitis C virus RNA assay<br>43X2: Hepatitis C antibody test<br>43X3: Hepatitis C antibody test positive<br>43X6: Hepatitis C antibody level<br>4J3B: Hepatitis C viral load<br>65PM: Hepatitis C contact<br>65Q7: Viral hepatitis carrier<br>677Q: Hepatitis C screening counselling<br>6829: Hepatitis C screening<br>4JQC: Hepatitis C viral ribonucleic acid PCR negative<br>4JQE: Hepatitis C antigen negative<br>8I3v: Hepatitis C screening declined<br>677Q: Hepatitis C screening counselling<br>43j50: Hepatitis C nucleic acid detection assay<br>9kT: Hepatitis C screening negative - enhanced services admin<br>9kR: Chronic hepatitis annual review - enhanced services admin<br>EMISNQHE30: "EMISNQHE30"<br>ZV01B: [V]Contact with and exposure to viral hepatitis |            |

|                                                                  |                                     |
|------------------------------------------------------------------|-------------------------------------|
| Name                                                             | REF                                 |
| Description                                                      | Referred to Secondary Care Services |
| Selection                                                        | Latest                              |
| Referenced by sections                                           | REF, REF, REF                       |
| Referenced by measures                                           |                                     |
| Read V2 Terms                                                    | CTV3 Terms                          |
| 8Hk5: Referred to hepatology service<br>EMISNQRE49: "EMISNQRE49" |                                     |

|             |                                  |
|-------------|----------------------------------|
| Name        | X_TEST                           |
| Description | Patients to exclude from testing |

|                          |            |
|--------------------------|------------|
| Selection                | Latest     |
| Referenced by sections   |            |
| Referenced by measures   |            |
| Read V2 Terms            | CTV3 Terms |
| 2J11: Hepatitis C immune |            |

|                                                                    |                         |
|--------------------------------------------------------------------|-------------------------|
| Name                                                               | OFFER                   |
| Description                                                        | Hep C screening offered |
| Selection                                                          | Latest                  |
| Referenced by sections                                             | OFFER, OFFER            |
| Referenced by measures                                             |                         |
| Read V2 Terms                                                      | CTV3 Terms              |
| 9Op1: Hepatitis C screening offered<br>6829: Hepatitis C screening |                         |

|                                                                                                                                                                                                                                                                                                                                                                                                                                                                                                                                                                                                                                                                                                                                                                                                     |                         |
|-----------------------------------------------------------------------------------------------------------------------------------------------------------------------------------------------------------------------------------------------------------------------------------------------------------------------------------------------------------------------------------------------------------------------------------------------------------------------------------------------------------------------------------------------------------------------------------------------------------------------------------------------------------------------------------------------------------------------------------------------------------------------------------------------------|-------------------------|
| Name                                                                                                                                                                                                                                                                                                                                                                                                                                                                                                                                                                                                                                                                                                                                                                                                | EOL                     |
| Description                                                                                                                                                                                                                                                                                                                                                                                                                                                                                                                                                                                                                                                                                                                                                                                         | Palliative care         |
| Selection                                                                                                                                                                                                                                                                                                                                                                                                                                                                                                                                                                                                                                                                                                                                                                                           | Latest                  |
| Referenced by sections                                                                                                                                                                                                                                                                                                                                                                                                                                                                                                                                                                                                                                                                                                                                                                              | EOL, EOL, EOL, EOL, EOL |
| Referenced by measures                                                                                                                                                                                                                                                                                                                                                                                                                                                                                                                                                                                                                                                                                                                                                                              |                         |
| Read V2 Terms                                                                                                                                                                                                                                                                                                                                                                                                                                                                                                                                                                                                                                                                                                                                                                                       | CTV3 Terms              |
| 1Z01: Terminal illness - late stage<br>2JE: Last days of life<br>8BA2: Terminal care<br>8BAP: Specialist palliative care<br>8BAS: Specialist palliative care treatment - daycare<br>8BAT: Specialist palliative care treatment - outpatient<br>8BAe: Anticipatory palliative care<br>8BJ1: Palliative treatment<br>8CM1%: On gold standards palliative care framework<br>I8CM15: (Excluding) GSF prognostic indicator stage A (blue) - yr plus prognosis<br>8CM4: Liverpool care pathway for the dying<br>8CME: Has end of life advance care plan<br>8H6A: Refer to terminal care consult<br>8H7L: Refer for terminal care<br>8H7g: Referral to palliative care service<br>8HH7: Referred to community specialist palliative care team<br>8IEE: Referral to community palliative care team declined |                         |

|                                                                                                                                                                                                                                                                                                                                                                                                                                                                                                                                                                                                                                                                                                                                                                                                                                                                                                                                                                                                                                                                                                                  |  |
|------------------------------------------------------------------------------------------------------------------------------------------------------------------------------------------------------------------------------------------------------------------------------------------------------------------------------------------------------------------------------------------------------------------------------------------------------------------------------------------------------------------------------------------------------------------------------------------------------------------------------------------------------------------------------------------------------------------------------------------------------------------------------------------------------------------------------------------------------------------------------------------------------------------------------------------------------------------------------------------------------------------------------------------------------------------------------------------------------------------|--|
| <p>9EB5: DS 1500 Disability living allowance completed</p> <p>9Ng7: On end of life care register</p> <p>ZV57C: [V]Palliative care</p> <p>8CMQ: On Liverpool care pathway for the dying</p> <p>9NgD: Under care of palliative care service</p> <p>9G8: Ambulance service notified of patient on EoL care register</p> <p>9c0P: Current palliative oncology treatment</p> <p>9c0N: Current supportive care for terminal illness</p> <p>8CMW3: End of life care pathway</p> <p>9K9: Palliative care handover form completed</p> <p>9367: Patient held palliative care record</p> <p>9c0L0: Planned palliative oncology treatment</p> <p>9c0M: Planned supportive care for terminal illness</p> <p>9NNd: Under care of palliative care specialist nurse</p> <p>8CMb: Integrated care priorities for end of life</p> <p>8CMg: End of life advance care plan</p> <p>8B2a: Prescription of palliative care anticipatory medication</p> <p>9NNf0: Under care of palliative care physician</p> <p>38QH: Palliative Care Outcomes Collaboration Assessment Toolkit</p> <p>38QK: Palliative Care Problem Severity Score</p> |  |
|------------------------------------------------------------------------------------------------------------------------------------------------------------------------------------------------------------------------------------------------------------------------------------------------------------------------------------------------------------------------------------------------------------------------------------------------------------------------------------------------------------------------------------------------------------------------------------------------------------------------------------------------------------------------------------------------------------------------------------------------------------------------------------------------------------------------------------------------------------------------------------------------------------------------------------------------------------------------------------------------------------------------------------------------------------------------------------------------------------------|--|

|                                                                                                                                                                                                                                      |            |  |
|--------------------------------------------------------------------------------------------------------------------------------------------------------------------------------------------------------------------------------------|------------|--|
| Name                                                                                                                                                                                                                                 | RIP        |  |
| Description                                                                                                                                                                                                                          | Death      |  |
| Selection                                                                                                                                                                                                                            | Latest     |  |
| Referenced by sections                                                                                                                                                                                                               |            |  |
| Referenced by measures                                                                                                                                                                                                               |            |  |
| Read V2 Terms                                                                                                                                                                                                                        | CTV3 Terms |  |
| <p>22J%: O/E - dead</p> <p>9134: Registration ghost - deceased</p> <p>94%: Death administration</p> <p>!942: (Excluding) Medical cert. of still-birth</p> <p>!94Z%: (Excluding) Death administration NOS</p> <p>9234: FP22-death</p> |            |  |

|                        |            |  |
|------------------------|------------|--|
| Name                   | ALT        |  |
| Description            | ALT levels |  |
| Selection              | Latest     |  |
| Referenced by sections |            |  |
| Referenced by measures |            |  |
| Read V2 Terms          | CTV3 Terms |  |

|                             |  |
|-----------------------------|--|
| 44G3%: ALT/SGPT serum level |  |
|-----------------------------|--|

|                                         |                                    |            |
|-----------------------------------------|------------------------------------|------------|
| Name                                    | XINVITE                            |            |
| Description                             | Exclude patient from invite column |            |
| Selection                               | Latest                             |            |
| Referenced by sections                  | XINVITE                            |            |
| Referenced by measures                  |                                    |            |
| Read V2 Terms                           |                                    | CTV3 Terms |
| 682A: Hepatitis C screening not offered |                                    |            |

## References

1. Sculpher M. Evaluating the cost-effectiveness of interventions designed to increase the utilization of evidence-based guidelines. *Family practice* 2000;17 Suppl 1:S26-31.
2. Ng ES, Diaz-Ordaz K, Grieve R, et al. Multilevel models for cost-effectiveness analyses that use cluster randomised trial data: An approach to model choice. *Stat Methods Med Res* 2016;25(5):2036-52. doi: 10.1177/0962280213511719 [published Online First: 2013/12/19]
3. (NICE) NIOHaCE. Guide to the methods of technology appraisal PMGP. NICE, 2013.
4. Harris RJ, Harris HE, Mandal S, et al. Monitoring the hepatitis C epidemic in England and evaluating intervention scale-up using routinely collected data. *J Viral Hepat* 2019 doi: 10.1111/jvh.13063 [published Online First: 2019/01/22]
5. Miners AH, Martin NK, Ghosh A, et al. Assessing the cost-effectiveness of finding cases of hepatitis C infection in UK migrant populations and the value of further research. *Journal of Viral Hepatitis* 2014;21(9):616-23. doi: 10.1111/jvh.12190
6. Martin NK, Vickerman P, Miners A, et al. The cost-effectiveness of HCV antiviral treatment for injecting drug user populations. *Hepatology* 2012;55(1):49-57. doi: 10.1002/hep.24656 [doi]
7. Office for National Statistics. National Life Tables: 2015-2017. 2018
8. Simmons R, Ireland G, Irving W, et al. Establishing the cascade of care for hepatitis C in England-benchmarking to monitor impact of direct acting antivirals. *J Viral Hepat* 2018;25(5):482-90. doi: 10.1111/jvh.12844 [published Online First: 2017/12/15]
9. Irving WL, McLauchlan J, Foster G. Real world outcomes of DAA therapy for chronic hepatitis C virus infection in the HCV Research UK National cohort. *J Hepatol* 2017;66(1):S504. doi: 10.1016/S0168-8278(17)31408-3
10. Bourlière M, Gordon C, Flamm S, et al. Sofosbuvir, Velpatasvir, and Voxilaprevir for Previously Treated HCV Infection. *N Engl J Med* 2017;376(22):2134-46. doi: 10.1056/NEJMoa1613512
11. Ward T, Gordon J, Bennett H, et al. Tackling the burden of the hepatitis C virus in the UK: characterizing and assessing the clinical and economic consequences. *Public Health* 2016;141:42-51. doi: 10.1016/j.puhe.2016.08.002 [published Online First: 2016/12/10]
12. Hurley R. Slashed cost of hepatitis C drugs spurs drive to eliminate the disease. *BMJ* 2018;361
13. Shepherd J, Jones J, Hartwell D, et al. Interferon alpha (pegylated and non-pegylated) and ribavirin for the treatment of mild chronic hepatitis C: a systematic review and economic evaluation. *Health Technol Assess* 2007;11(11):1-205, iii. doi: 04/49/01 [pii]

14. Grishchenko M, Grieve R, Sweeting M, et al. Cost-effectiveness of pegylated interferon and ribavirin for patients with chronic hepatitis C treated in routine clinical practice. *Int J Technol Assess Health Care* 2009;25(2):171-80.
15. Wright M, Grieve R, Roberts J, et al. Health benefits of antiviral therapy for mild chronic hepatitis C: randomised controlled trial and economic evaluation. *Health Technol Assess* 2006;10(21):1-113, iii. doi: 95-24-03 [pii]
16. Ratcliffe J, Longworth L, Young T, et al. Assessing health-related quality of life pre- and post-liver transplantation: a prospective multicenter study. *Liver Transpl* 2002;8(3):263-70.
17. McDonald SA, Hutchinson SJ, Palmateer NE, et al. Decrease in health-related quality of life associated with awareness of hepatitis C virus infection among people who inject drugs in Scotland. *JHepatol* 2013;58(3):460-66. doi: S0168-8278(12)00836-7 [pii];10.1016/j.jhep.2012.11.004 [doi]
18. Martin NK, Hickman M, Miners A, et al. Cost-effectiveness of HCV case-finding for people who inject drugs via dried blood spot testing in specialist addiction services and prisons. *BMJ open* 2013;3(8) doi: 10.1136/bmjopen-2013-003153
19. Hartwell D, Jones J, Baxter L, et al. Peginterferon alfa and ribavirin for chronic hepatitis C in patients eligible for shortened treatment, retreatment, or in HCV/HIV co-infection: a systematic review and economic evaluation. *Health Technol Assess* 2011;15:1-210.
20. Sweeting MJ, D. DA, Brant LJ, et al. The burden of hepatitis C in England. *JViral Hepat* 2007;14(8):570-76. doi: JVH851 [pii];10.1111/j.1365-2893.2007.00851.x [doi]
21. Van der Meer AJ, Veldt BJ, Feld JJ, et al. Association between sustained virological response and all-cause mortality among patients with chronic hepatitis c and advanced hepatic fibrosis. *JAMA* 2012;308(24):2584-93. doi: 10.1001/jama.2012.144878
22. Morgan RL, Baack B, Smith BD, et al. Eradication of hepatitis c virus infection and the development of hepatocellular carcinoma: A meta-analysis of observational studies. *Ann Intern Med* 2013;158(5):329-37. doi: 10.7326/0003-4819-158-5-201303050-00005
